# Supplementary material
Source: publisher site journal article supplement (https://www.spandidos-publications.com/1806/downloadSupplementary)
Supplement: Supplementary file 1 [file downloadSupplementary]

## Sheet: Sheet1
Table SII. GO enrichment analysis of the differentially expressed genes. GO, Gene Ontology; CC, cellular component; BP, biological process; MF, molecular function.
A, Upregulated genes
Category	Term	Count	%	P-value	Genes	List Total	Pop Hits	Pop Total	Fold Enrichment	Bonferroni	Benjamini
GOTERM_CC_DIRECT	GO:0005615~extracellular space	97	25.1295	5.92228e-28	S100A4, CTHRC1, MMP9, MMP7, POSTN, MMP3, CXCL10, WNT2, FAP, TGFBI, COL12A1, MUC13, ADAM9, PTPRR, CST2, CST1, TCN1, TNFAIP6, F5, CST6, COL1A2, LAMC2, COL1A1, WFDC2, XDH, WNT5A, ODAM, OLFM4, BPIFB1, GREM1, SERPINH1, TIMP1, LGALS3BP, MSLN, TFF2, TFF3, TFF1, FN1, BMP4, PLAT, MUC1, LGALS4, LGALS1, IL1RN, S100A11, ECM1, MUC4, LCN2, APOL1, TNFSF11, SRPX2, SFRP4, AREG, AGR2, PLAU, PXDN, AEBP1, WISP1, CEA…	378	1347	18224	3.47181	1.65232e-25	1.65232e-25
GOTERM_CC_DIRECT	GO:0005578~proteinaceous extracellular matrix	40	10.3627	4.92793e-22	WNT5A, CTHRC1, PXDN, MMP9, MMP7, SPOCK1, POSTN, MMP28, MMP3, MMP1, TIMP1, WNT2, LGALS3BP, COL17A1, WISP1, COMP, TGFBI, TFF3, ADAMTS12, COL11A1, COL10A1, FN1, BMP4, MATN3, OLFML2B, LGALS1, SPARC, ECM1, COL5A2, MMP12, NDNF, COL5A1, MMP11, MUC4, MMP10, BGN, PI3, COL1A2, VCAN, EPYC	378	268	18224	7.19577	1.37489e-19	6.87446e-20
GOTERM_CC_DIRECT	GO:0005576~extracellular region	84	21.7617	3.37723e-15	FAM3D, MMP9, MMP7, MMP3, SPINK5, MMP1, CXCL10, WNT2, IL1RAP, TGFBI, COL12A1, KLK10, LOXL1, COL11A1, COL10A1, MATN3, OLFML2B, LYZ, TCN1, MMP12, NDNF, MMP11, GRP, MMP10, INHBA, CTSK, BGN, F5, SERPINB2, COL1A2, CEMIP, EFNA5, VCAN, LAMC2, TREM1, COL1A1, WFDC2, WNT5A, IL1R2, ODAM, BPIFB1, CXCL5, COL3A1, OAS1, ESM1, MDK, TIMP1, LAMB3, LGALS3BP, COL17A1, CCL20, FNDC1, COMP, TFF3, SFTA2, COL8A1, FGFBP1, …	378	1610	18224	2.51539	9.29257e-13	3.09752e-13
GOTERM_CC_DIRECT	GO:0070062~extracellular exosome	119	30.829	4.408e-15	S100A4, S100A6, TSPAN1, SLC44A4, MMP9, CRABP2, MMP7, TSPAN8, EDIL3, SLC2A1, TGFBI, PLS1, COL12A1, NQO1, MUC13, ADAM9, CLRN3, SCEL, PLAUR, JUP, KRT19, CST6, KRT16, AKR1B10, COL1A2, PSCA, WFDC2, EPS8L1, WNT5A, GCNT3, BPIFB1, FXYD3, OLFM4, SERPINH1, TIMP1, LGALS3BP, PPL, TFF2, TFF3, FN1, MUC1, PLAT, S100P, S100A16, MYO1E, LGALS1, IL1RN, S100A11, SLC6A14, S100A10, ITGA3, S100A14, ECM1, MUC4, PDZK1IP1…	378	2811	18224	2.04098	1.23901e-12	3.09752e-13
GOTERM_BP_DIRECT	GO:0030198~extracellular matrix organization	28	7.25389	7.88662e-15	MATN3, PXDN, OLFML2B, COL3A1, ITGA2, ITGA3, POSTN, SPARC, SPINK5, COL5A2, NDNF, COL5A1, LAMB3, LAMA3, BGN, SERPINB5, COMP, FOXF2, TGFBI, COL1A2, VCAN, LAMC2, COL1A1, COL8A1, COL11A1, LOXL1, FN1, COL10A1	353	196	16792	6.79563	1.50006e-11	1.50006e-11
GOTERM_BP_DIRECT	GO:0030574~collagen catabolic process	18	4.66321	1.11447e-14	KLK6, MMP9, COL3A1, MMP7, MMP3, COL5A2, MMP12, COL5A1, MMP1, MMP11, MMP10, CTSK, COL1A2, COL12A1, COL1A1, COL8A1, COL11A1, COL10A1	353	64	16792	13.3789	2.11275e-11	1.05638e-11
GOTERM_CC_DIRECT	GO:0031012~extracellular matrix	33	8.54922	1.97391e-14	AEBP1, PXDN, COL3A1, MMP7, POSTN, EDIL3, MMP1, WNT2, LGALS3BP, COMP, TGFBI, TGM2, COL12A1, ADAMTS12, COL8A1, LOXL1, THBS2, FN1, PLAT, LGALS1, PFKP, COL5A2, ECM1, COL5A1, NDNF, MMP11, JUP, MMP10, BGN, COL1A2, SLPI, VCAN, COL1A1	378	296	18224	5.37495	5.51359e-12	1.10267e-12
GOTERM_BP_DIRECT	GO:0022617~extracellular matrix disassembly	15	3.88601	5.192e-10	KLK7, MMP9, MMP7, MMP3, MMP12, MMP1, TIMP1, MMP11, MMP10, CTSK, LAMB3, LAMA3, CAPG, LAMC2, FN1	353	76	16792	9.3887	9.88038e-07	3.29346e-07
GOTERM_BP_DIRECT	GO:0007155~cell adhesion	34	8.80829	7.24658e-10	OLFM4, FERMT1, SPOCK1, POSTN, EDIL3, CDH3, LGALS3BP, LAMB3, WISP1, COMP, FAP, TGFBI, MSLN, COL12A1, COL8A1, THBS2, CEACAM1, ADAM9, FN1, OLR1, LGALS4, EFNB2, ITGA2, ITGA3, COL5A1, JUP, TNFAIP6, EPHA4, LAMA3, VCAN, LAMC2, COL1A1, MUC16, CDH11	353	459	16792	3.52366	1.37902e-06	3.44756e-07
GOTERM_BP_DIRECT	GO:0042060~wound healing	14	3.62694	1.07559e-08	WNT5A, KRT6A, COL3A1, SPARC, CDH3, TIMP1, SDC1, CCL20, SERPINB2, SPRR3, TFF2, TFF3, TFF1, FN1	353	80	16792	8.32465	2.04682e-05	4.09368e-06
GOTERM_BP_DIRECT	GO:0030199~collagen fibril organization	10	2.59067	8.58809e-08	COL3A1, COL1A2, COL12A1, COL1A1, GREM1, COL11A1, SERPINH1, COL5A2, COL5A1, MMP11	353	39	16792	12.1973	0.000163418	2.72382e-05
GOTERM_BP_DIRECT	GO:0001501~skeletal system development	16	4.14508	1.88953e-07	MATN3, AEBP1, HOXA13, MMP9, COL3A1, POSTN, NPR3, COL5A2, EPHA2, COMP, COL1A2, COL12A1, VCAN, COL1A1, CDH11, COL10A1	353	137	16792	5.55555	0.000359512	5.13668e-05
GOTERM_CC_DIRECT	GO:0009986~cell surface	32	8.29016	3.52645e-07	WNT5A, CD109, MMP7, GREM1, HMMR, FAP, MSLN, NT5E, FGFBP1, CEACAM1, ADAM9, PLAT, TNFSF4, LGALS1, MET, ITGA2, ITGA3, SPARC, EPHA2, EPHA4, SDC1, CD55, BGN, SULF2, SRPX2, SFRP4, SULF1, SLC26A9, MST1R, ANTXR1, AREG, PLAU	378	542	18224	2.84644	9.83832e-05	1.63979e-05
GOTERM_MF_DIRECT	GO:0005518~collagen binding	11	2.84974	3.58158e-07	CTSK, COMP, MMP9, TGFBI, ITGA2, ITGA3, SPARC, ANTXR1, SERPINH1, FN1, ADAM9	348	60	16881	8.89325	0.00019088	0.00019088
GOTERM_CC_DIRECT	GO:0005581~collagen trimer	13	3.36788	4.22514e-07	CTHRC1, COL17A1, COL3A1, COL1A2, COL12A1, COL1A1, SERPINH1, COL5A2, COL11A1, MMP1, COL5A1, COL10A1, TIMP1	378	92	18224	6.81251	0.000117875	1.68401e-05
GOTERM_BP_DIRECT	GO:0035987~endodermal cell differentiation	8	2.07254	1.03685e-06	INHBA, LAMB3, LAMA3, MMP9, COL12A1, COL8A1, COL11A1, FN1	353	27	16792	14.0946	0.00197118	0.00024661
GOTERM_MF_DIRECT	GO:0005201~extracellular matrix structural constituent	11	2.84974	1.03705e-06	MATN3, PXDN, BGN, COMP, COL3A1, COL1A2, VCAN, COL1A1, COL11A1, COL5A2, COL5A1	348	67	16881	7.9641	0.000552596	0.000276336
GOTERM_MF_DIRECT	GO:0004222~metalloendopeptidase activity	13	3.36788	3.61734e-06	ADAM28, KLK7, MMP10, FAP, MMP9, MMP7, ADAMTS12, MMP28, MMP3, MMP1, MMP12, ADAM9, MMP11	348	113	16881	5.58064	0.00192619	0.000642476
GOTERM_MF_DIRECT	GO:0005509~calcium ion binding	35	9.06736	5.34726e-06	S100A4, S100A6, DUOX2, SPOCK1, MMP28, EDIL3, MMP3, CDH3, MMP1, SLC24A3, COMP, PLS1, THBS2, S100A2, MATN3, S100P, S100A16, CAPN8, S100A11, S100A10, PCDH7, SPARC, S100A14, MMP12, ANXA3, MMP11, MMP10, ANXA10, SULF2, DSG3, SULF1, SYTL2, VCAN, MELK, CDH11	348	717	16881	2.36792	0.00284604	0.00071227
GOTERM_MF_DIRECT	GO:0008201~heparin binding	15	3.88601	5.68921e-06	BMP4, MMP7, POSTN, MDK, NDNF, COL5A1, CXCL10, WISP1, COMP, LIPH, LAMC2, EPYC, FGFBP1, THBS2, FN1	348	160	16881	4.54768	0.00302777	0.000606288
GOTERM_BP_DIRECT	GO:0060337~type I interferon signaling pathway	10	2.59067	7.0373e-06	IFI27, OASL, RSAD2, OAS1, XAF1, OAS2, MX1, MX2, GBP2, IFI6	353	64	16792	7.43272	0.0133028	0.0014869
GOTERM_MF_DIRECT	GO:0005178~integrin binding	12	3.10881	1.05057e-05	WISP1, FAP, COL3A1, TGFBI, ITGA2, TSPAN8, ITGA3, EDIL3, ESM1, COL5A1, FN1, ADAM9	348	105	16881	5.54384	0.0055839	0.000932822
GOTERM_BP_DIRECT	GO:0008544~epidermis development	11	2.84974	1.11807e-05	KLK7, COL17A1, LAMB3, LAMA3, CST6, KRT16, SPRR1B, CRABP2, SPRR3, LAMC2, SCEL	353	85	16792	6.15604	0.0210523	0.00212544
GOTERM_BP_DIRECT	GO:0009615~response to virus	12	3.10881	1.96637e-05	LCN2, OASL, TNFSF4, DDX60, DUOX2, RSAD2, OAS1, IFI44, MST1R, OAS2, MX1, MX2	353	110	16792	5.18939	0.0367289	0.00339608
GOTERM_MF_DIRECT	GO:0004252~serine-type endopeptidase activity	18	4.66321	2.25564e-05	KLK6, PLAT, KLK7, MMP9, MMP7, MMP3, TMPRSS3, MMP12, MMP1, TMPRSS4, MMP11, MMP10, CTSK, F5, FAP, RHBDL2, KLK10, PLAU	348	255	16881	3.42414	0.0119507	0.00171605
GOTERM_CC_DIRECT	GO:0005796~Golgi lumen	11	2.84974	2.95863e-05	MUC1, WNT5A, SDC1, BGN, HS3ST1, VCAN, MUC13, MUC17, MMP11, MUC4, MUC16	378	96	18224	5.52425	0.00822073	0.00103131
GOTERM_BP_DIRECT	GO:0016266~O-glycan processing	9	2.33161	3.40626e-05	MUC1, GCNT3, GALNT5, B3GNT3, MUC13, MUC17, C1GALT1, MUC4, MUC16	353	60	16792	7.13541	0.0627659	0.00538729
GOTERM_MF_DIRECT	GO:0002020~protease binding	11	2.84974	4.33206e-05	LCN2, CST6, FAP, COMP, CST2, CST1, ITGA3, SERPINB3, ECM1, FN1, TIMP1	348	101	16881	5.28312	0.0228259	0.00288214
GOTERM_CC_DIRECT	GO:0005788~endoplasmic reticulum lumen	15	3.88601	4.83623e-05	WNT5A, COL17A1, F5, COL3A1, COL1A2, COL12A1, GPX8, COL1A1, COL8A1, SERPINH1, COL5A2, COL11A1, COL5A1, PLAUR, COL10A1	378	192	18224	3.76653	0.0134028	0.00149815
GOTERM_BP_DIRECT	GO:0008284~positive regulation of cell proliferation	24	6.21762	0.000137977	KLF5, KIF14, KRT6A, TNFSF4, CXCL5, PRC1, EFNB2, TTK, LEF1, CDC20, ESM1, GREM1, CXCL10, PLAC8, TIMP1, WNT2, CEACAM6, LAMC2, MST1R, SERPINB3, AREG, HTR2B, FGFBP1, FN1	353	466	16792	2.44993	0.230942	0.0199965
GOTERM_MF_DIRECT	GO:0004867~serine-type endopeptidase inhibitor activity	10	2.59067	0.000172244	SERPINB5, PI3, CD109, SERPINB2, SLPI, SPOCK1, SERPINB3, SERPINH1, SPINK5, WFDC2	348	97	16881	5.00089	0.0877251	0.0101497
GOTERM_CC_DIRECT	GO:0005604~basement membrane	9	2.33161	0.000225872	COL17A1, LAMA3, TGFBI, EFNA5, SPARC, THBS2, LOXL1, COL5A1, TIMP1	378	79	18224	5.49247	0.0610805	0.00628273
GOTERM_BP_DIRECT	GO:0008283~cell proliferation	20	5.18135	0.00027702	MIA, STIL, CDK1, CRIP1, TSPAN1, DLGAP5, MET, TPX2, ITGA2, CENPF, FAM83D, EDNRA, FAM83B, FAM83A, KRT16, TGFBI, CKS2, BUB1B, AREG, MELK	353	366	16792	2.59942	0.40977	0.0369599
GOTERM_BP_DIRECT	GO:0016477~cell migration	13	3.36788	0.000280663	CDK1, CTHRC1, TSPAN1, MDK, COL5A1, EPHA2, JUP, FAM83D, SDC1, STYK1, ADAMTS12, CEACAM1, ADAM9	353	172	16792	3.59536	0.413848	0.0349851
GOTERM_CC_DIRECT	GO:0030496~midbody	11	2.84974	0.000353312	KIF14, CDK1, PRC1, NEK2, SLC2A1, CENPF, CEP55, ECT2, ASPM, SHCBP1, KIF20A	378	129	18224	4.11107	0.0938873	0.00892282
GOTERM_MF_DIRECT	GO:0004869~cysteine-type endopeptidase inhibitor activity	6	1.5544	0.000607659	CST6, CST2, CST1, SPOCK1, SERPINB3, WFDC2	348	34	16881	8.56034	0.276736	0.0318789
GOTERM_BP_DIRECT	GO:0043588~skin development	6	1.5544	0.000663923	JUP, COL3A1, GJB3, ITGA3, COL5A2, COL5A1	353	34	16792	8.3946	0.71744	0.0759523
GOTERM_BP_DIRECT	GO:0007067~mitotic nuclear division	15	3.88601	0.000787532	CDK1, KIF11, NEK2, NUF2, TPX2, CENPF, NDC80, CDC20, ANLN, PBK, CEP55, FAM83D, BUB1B, CENPW, ASPM	353	248	16792	2.87718	0.776706	0.0844149
GOTERM_BP_DIRECT	GO:0040037~negative regulation of fibroblast growth factor receptor signaling pathway	4	1.03627	0.000982305	WNT5A, SULF2, SHISA2, SULF1	353	10	16792	19.0278	0.845914	0.0986868
GOTERM_BP_DIRECT	GO:0010951~negative regulation of endopeptidase activity	10	2.59067	0.00101642	SERPINB5, PI3, CD109, SERPINB2, SLPI, SPOCK1, SERPINB3, SERPINH1, WFDC2, TIMP1	353	121	16792	3.93136	0.855609	0.0968387
GOTERM_BP_DIRECT	GO:0050900~leukocyte migration	10	2.59067	0.00107758	OLR1, MMP9, COL1A2, CEACAM6, ITGA3, COL1A1, TREM1, CEACAM1, MMP1, FN1	353	122	16792	3.89913	0.871488	0.0975
GOTERM_MF_DIRECT	GO:0048407~platelet-derived growth factor binding	4	1.03627	0.00125678	COL3A1, COL1A2, COL1A1, COL5A1	348	11	16881	17.6395	0.488437	0.0591156
GOTERM_MF_DIRECT	GO:0043236~laminin binding	5	1.29534	0.00157733	LGALS1, ITGA2, ITGA3, ECM1, ADAM9	348	25	16881	9.70172	0.568885	0.0677134
GOTERM_BP_DIRECT	GO:0030277~maintenance of gastrointestinal epithelium	4	1.03627	0.0017456	VSIG1, TFF1, MUC13, MUC4	353	12	16792	15.8565	0.96402	0.146426
GOTERM_BP_DIRECT	GO:0031581~hemidesmosome assembly	4	1.03627	0.0017456	COL17A1, LAMB3, LAMA3, LAMC2	353	12	16792	15.8565	0.96402	0.146426
GOTERM_MF_DIRECT	GO:0050840~extracellular matrix binding	5	1.29534	0.00183423	BGN, OLFML2B, TGFBI, SPARC, COL11A1	348	26	16881	9.32858	0.624142	0.0725093
GOTERM_BP_DIRECT	GO:0007586~digestion	7	1.81347	0.00202143	CAPN8, AKR1B10, TFF2, CTSE, TFF3, TFF1, NMU	353	63	16792	5.28549	0.978735	0.160569
GOTERM_BP_DIRECT	GO:0043434~response to peptide hormone	6	1.5544	0.0021841	CD55, COL1A1, TFF1, AREG, SPARC, TIMP1	353	44	16792	6.48674	0.984406	0.165488
GOTERM_BP_DIRECT	GO:0051384~response to glucocorticoid	7	1.81347	0.00237309	SDC1, IL1RN, AREG, SPARC, MDK, ANXA3, ADAM9	353	65	16792	5.12286	0.989126	0.171708
GOTERM_CC_DIRECT	GO:0031225~anchored component of membrane	9	2.33161	0.00241676	CD55, LY6E, MSLN, CD109, CEACAM6, PSCA, CEACAM5, NT5E, PLAUR	378	113	18224	3.83987	0.49089	0.0547044
GOTERM_BP_DIRECT	GO:0007165~signal transduction	40	10.3627	0.00243581	TNFRSF21, S100A6, CXCL5, RHPN2, CRABP2, PPARG, SPOCK1, SFN, GREM1, GPRC5A, MDK, CXCL10, EDNRA, LGALS3BP, WISP1, CCL20, CEACAM6, MX1, FGFBP1, NMU, GABRP, LY75, TNFSF4, LGALS1, MET, S100A11, SPARC, ECM1, CCL18, PLAUR, JUP, GRP, TNFAIP6, NR1I2, CLIC3, INPP4B, MST1R, ANTXR1, PLAU, IGFBP5	353	1161	16792	1.63891	0.990352	0.169428
GOTERM_MF_DIRECT	GO:0001730~2'-5'-oligoadenylate synthetase activity	3	0.777202	0.00245968	OASL, OAS1, OAS2	348	4	16881	36.3815	0.730888	0.0894978
GOTERM_BP_DIRECT	GO:0051607~defense response to virus	11	2.84974	0.00255654	OASL, DDX60, RSAD2, IFI44L, OAS1, OAS2, PMAIP1, MX1, GBP3, MX2, CXCL10	353	165	16792	3.17129	0.992337	0.170854
GOTERM_BP_DIRECT	GO:0060686~negative regulation of prostatic bud formation	3	0.777202	0.00255668	WNT5A, BMP4, SULF1	353	4	16792	35.6771	0.992339	0.165089
GOTERM_BP_DIRECT	GO:0007160~cell-matrix adhesion	8	2.07254	0.00282474	COL17A1, COL3A1, MSLN, ITGA2, ITGA3, ADAMTS12, ADAM9, MUC4	353	90	16792	4.22839	0.995406	0.174902
GOTERM_BP_DIRECT	GO:0007267~cell-cell signaling	14	3.62694	0.00286388	CXCL5, EFNB2, GREM1, CCL18, GJB2, CXCL10, WNT2, TNFAIP6, INHBA, WISP1, CCL20, CEACAM6, AREG, FGFBP1	353	254	16792	2.62194	0.995737	0.17155
GOTERM_BP_DIRECT	GO:0007059~chromosome segregation	7	1.81347	0.00298441	KIF11, NEK2, NUF2, CENPF, CENPW, NDC80, TOP2A	353	68	16792	4.89685	0.996613	0.172705
GOTERM_BP_DIRECT	GO:0031424~keratinization	6	1.5544	0.0032169	KRT16, SPRR1B, PPL, SPRR3, SFN, CDH3	353	48	16792	5.94618	0.997827	0.179462
GOTERM_BP_DIRECT	GO:0007052~mitotic spindle organization	5	1.29534	0.00338145	CCNB1, STIL, KIF11, TTK, NDC80	353	30	16792	7.92823	0.998413	0.18244
GOTERM_BP_DIRECT	GO:0006955~immune response	19	4.92228	0.00348325	LY75, TNFRSF21, IL1R2, PXDN, CRIP1, TNFSF4, CXCL5, IL1RN, OAS1, OAS2, CCL18, CXCL10, TNFSF11, CCL20, IL1RAP, SLPI, SEMA3C, GBP2, IFI6	353	421	16792	2.14684	0.998693	0.182266
GOTERM_MF_DIRECT	GO:0005125~cytokine activity	11	2.84974	0.00353787	WNT5A, WNT2, BMP4, INHBA, TNFSF4, TNFSF11, FAM3D, IL1RN, AREG, GREM1, TIMP1	348	176	16881	3.03179	0.848781	0.118328
GOTERM_BP_DIRECT	GO:0043066~negative regulation of apoptotic process	20	5.18135	0.00354851	WNT5A, BMP4, KIF14, STIL, CDK1, MMP9, FHL2, LEF1, GREM1, PLAUR, TIMP1, PLAC8, AMIGO2, ID1, COMP, SERPINB2, TGM2, CEACAM5, HTR2B, NQO1	353	455	16792	2.09096	0.998846	0.180422
GOTERM_CC_DIRECT	GO:0005819~spindle	9	2.33161	0.00368758	KIF11, PRC1, TPX2, NUSAP1, CENPF, TTK, CDC20, SHCBP1, KIF20A	378	121	18224	3.58599	0.643256	0.0762256
GOTERM_BP_DIRECT	GO:0006508~proteolysis	21	5.44041	0.00453128	ADAM28, PLAT, KLK7, OLR1, CAPN8, MMP9, MMP7, MMP28, MMP3, TMPRSS3, MMP12, MMP1, TMPRSS4, MMP11, MMP10, CTSK, F5, FAP, KLK10, WFDC2, PLAU	353	500	16792	1.99792	0.999824	0.218806
GOTERM_BP_DIRECT	GO:0030216~keratinocyte differentiation	7	1.81347	0.00518675	WNT5A, KRT16, SPRR1B, SPRR3, SCEL, EPHA2, ADAM9	353	76	16792	4.38139	0.99995	0.240345
GOTERM_CC_DIRECT	GO:0048471~perinuclear region of cytoplasm	24	6.21762	0.00533288	S100A4, NOX4, S100A6, OLFM4, TSPAN1, MAL2, MLPH, RHPN2, PPARG, PTPRR, ITGA2, CENPF, ITGA3, CDC20, OAS2, S100A14, SPINK5, INHBA, BUB1B, HEPH, LAMC2, MX1, GBP3, GBP2	378	621	18224	1.86325	0.775045	0.10108
GOTERM_BP_DIRECT	GO:0001837~epithelial to mesenchymal transition	5	1.29534	0.00535885	S100A4, WNT5A, FAM83D, FOXF2, LEF1	353	34	16792	6.9955	0.999964	0.24146
GOTERM_MF_DIRECT	GO:0005539~glycosaminoglycan binding	4	1.03627	0.00558674	BGN, VCAN, EPYC, NDNF	348	18	16881	10.7797	0.949515	0.17025
GOTERM_CC_DIRECT	GO:0071438~invadopodium membrane	3	0.777202	0.00605927	FAP, ITGA3, PLAUR	378	6	18224	24.1058	0.816525	0.10689
GOTERM_BP_DIRECT	GO:0032964~collagen biosynthetic process	3	0.777202	0.00621604	COL1A1, SERPINH1, COL5A1	353	6	16792	23.7847	0.999993	0.268212
GOTERM_BP_DIRECT	GO:0001649~osteoblast differentiation	8	2.07254	0.00627061	BMP4, FHL2, LEF1, VCAN, COL1A1, IGFBP3, EPHA2, IGFBP5	353	104	16792	3.65919	0.999994	0.264303
GOTERM_MF_DIRECT	GO:0005515~protein binding	205	53.1088	0.00629512	S100A4, RARRES3, S100A6, POSTN, MALL, FAP, ADAM9, S100A2, COL10A1, MATN3, NCF2, EFNB2, PTPRR, SCEL, PLAUR, JUP, KRT19, F5, KRT16, MST1R, EPS8L1, ODAM, IL1R2, OLFM4, RTP4, NEK2, ASAP2, OAS1, OAS2, IGF2BP3, LAMB3, AHNAK2, SGIP1, BMP4, KLF5, PLAT, S100A16, OSBPL3, LGALS1, IL1RN, NUF2, S100A11, S100A10, NDC80, CDC20, S100A14, ECM1, EPHA2, EPHA4, CD55, APOL1, NR1I2, C1ORF116, SRPX2, SFRP4, HOPX, SYTL2…	348	8785	16881	1.13196	0.965469	0.179625
GOTERM_BP_DIRECT	GO:0006954~inflammatory response	17	4.40415	0.00639956	NOX4, LY75, TNFRSF21, ODAM, OLR1, CXCL5, LYZ, ECM1, EPHA2, CCL18, CXCL10, TNFAIP6, SDC1, CCL20, KRT16, IL1RAP, MGLL	353	379	16792	2.13372	0.999995	0.263199
GOTERM_BP_DIRECT	GO:0001503~ossification	7	1.81347	0.00665152	TNFSF11, MMP9, SPARC, COL11A1, ECM1, COL5A2, CDH11	353	80	16792	4.16232	0.999997	0.266376
GOTERM_BP_DIRECT	GO:0001558~regulation of cell growth	7	1.81347	0.00665152	KIF14, WISP1, SPOCK1, ESM1, IGFBP3, CEACAM1, IGFBP5	353	80	16792	4.16232	0.999997	0.266376
GOTERM_CC_DIRECT	GO:0031258~lamellipodium membrane	4	1.03627	0.0066535	PLEK2, FAP, ANTXR1, EPHA2	378	19	18224	10.1498	0.844721	0.109888
GOTERM_BP_DIRECT	GO:0051301~cell division	16	4.14508	0.00736052	KIF14, CDK1, KIF11, NEK2, NUF2, TPX2, CENPF, NDC80, CDC20, UBE2C, FAM83D, CCNB1, CDCA7, CKS2, CENPW, BUB1B	353	350	16792	2.1746	0.999999	0.284472
GOTERM_MF_DIRECT	GO:0005200~structural constituent of cytoskeleton	8	2.07254	0.00763094	KRT19, KRT6A, KRT6B, KRT16, PPL, PLS1, NDC80, VILL	348	110	16881	3.5279	0.983141	0.202941
GOTERM_BP_DIRECT	GO:0001525~angiogenesis	12	3.10881	0.00768427	KLF5, SRPX2, ID1, FAP, TGFBI, ESM1, COL8A1, ECM1, CEACAM1, NDNF, C1GALT1, FN1	353	223	16792	2.55979	1	0.289216
GOTERM_CC_DIRECT	GO:0016324~apical plasma membrane	14	3.62694	0.00778932	MUC1, NOX4, MAL2, ANO1, DUOX2, NHS, KCNK1, CD55, SLC26A9, SLC2A1, MUC17, MUC13, CEACAM1, FN1	378	291	18224	2.31946	0.887154	0.120443
GOTERM_BP_DIRECT	GO:0001568~blood vessel development	5	1.29534	0.00798942	COL1A2, COL1A1, ANTXR1, CEACAM1, COL5A1	353	38	16792	6.25913	1	0.293145
GOTERM_BP_DIRECT	GO:0010811~positive regulation of cell-substrate adhesion	5	1.29534	0.00798942	ITGA3, EDIL3, COL8A1, AGR2, NDNF	353	38	16792	6.25913	1	0.293145
GOTERM_BP_DIRECT	GO:0045606~positive regulation of epidermal cell differentiation	3	0.777202	0.00858236	BMP4, SFRP4, SFN	353	7	16792	20.3869	1	0.305459
GOTERM_BP_DIRECT	GO:0042730~fibrinolysis	4	1.03627	0.00917882	PLAT, SERPINB2, PLAU, PLAUR	353	21	16792	9.06084	1	0.317148
GOTERM_MF_DIRECT	GO:0019903~protein phosphatase binding	6	1.5544	0.00946378	JUP, KCNN4, NEK2, PPARG, MET, CEACAM1	348	63	16881	4.61987	0.993706	0.234134
GOTERM_BP_DIRECT	GO:0045071~negative regulation of viral genome replication	5	1.29534	0.00957409	OASL, SLPI, RSAD2, OAS1, MX1	353	40	16792	5.94618	1	0.322616
GOTERM_BP_DIRECT	GO:0051965~positive regulation of synapse assembly	6	1.5544	0.00958979	AMIGO2, SRPX2, IL1RAP, LRRN1, EFNA5, THBS2	353	62	16792	4.60349	1	0.317525
GOTERM_BP_DIRECT	GO:0016525~negative regulation of angiogenesis	6	1.5544	0.00958979	SULF1, SPARC, THBS2, SPINK5, EPHA2, CXCL10	353	62	16792	4.60349	1	0.317525
GOTERM_BP_DIRECT	GO:0010628~positive regulation of gene expression	13	3.36788	0.00964915	CDK1, ODAM, LEF1, ITGA3, CDH3, LCN2, INHBA, NR1I2, ID1, SLC26A9, SFRP4, AGR2, FN1	353	262	16792	2.36031	1	0.313783
GOTERM_MF_DIRECT	GO:0045296~cadherin binding	4	1.03627	0.0112414	JUP, OLFM4, FXYD5, TBC1D2	348	23	16881	8.43628	0.997584	0.26013
GOTERM_MF_DIRECT	GO:0005540~hyaluronic acid binding	4	1.03627	0.0112414	TNFAIP6, CEMIP, VCAN, HMMR	348	23	16881	8.43628	0.997584	0.26013
GOTERM_BP_DIRECT	GO:0051439~regulation of ubiquitin-protein ligase activity involved in mitotic cell cycle	4	1.03627	0.0118514	CCNB1, CDK1, CDC20, UBE2C	353	23	16792	8.27294	1	0.364765
GOTERM_BP_DIRECT	GO:0042493~response to drug	14	3.62694	0.0123645	LCN2, CCNB1, INHBA, CDK1, LGALS1, PPARG, SEMA3C, CENPF, ITGA2, ITGA3, COL1A1, HTR2B, CDH3, MDK	353	304	16792	2.1907	1	0.371389
GOTERM_BP_DIRECT	GO:0098609~cell-cell adhesion	13	3.36788	0.0123917	S100P, BAIAP2L1, TRIM29, PFKP, S100A11, ANLN, SFN, GPRC5A, EPHA2, PPL, CAPG, CEACAM1, EPS8L1	353	271	16792	2.28193	1	0.36639
GOTERM_BP_DIRECT	GO:0006952~defense response	6	1.5544	0.0131558	KCNN4, INHBA, TFF3, MST1R, MX1, MX2	353	67	16792	4.25995	1	0.378427
GOTERM_BP_DIRECT	GO:0055114~oxidation-reduction process	22	5.69948	0.0135453	NOX4, C15ORF48, XDH, PXDN, NCF2, CYP2C18, CYP2S1, DUOX2, EGLN3, DHRS9, GPX2, SQLE, RRM2, ASPHD2, AKR1B10, SDR16C5, HEPH, CYP4F3, GPX8, CP, NQO1, LOXL1	353	592	16792	1.76778	1	0.381594
GOTERM_BP_DIRECT	GO:0043589~skin morphogenesis	3	0.777202	0.0143104	COL1A2, ITGA2, COL1A1	353	9	16792	15.8565	1	0.39269
GOTERM_BP_DIRECT	GO:0001960~negative regulation of cytokine-mediated signaling pathway	3	0.777202	0.0143104	PXDN, IL1RN, ECM1	353	9	16792	15.8565	1	0.39269
GOTERM_BP_DIRECT	GO:0032836~glomerular basement membrane development	3	0.777202	0.0143104	SULF2, MYO1E, SULF1	353	9	16792	15.8565	1	0.39269
GOTERM_BP_DIRECT	GO:0003094~glomerular filtration	3	0.777202	0.0143104	SULF2, MYO1E, SULF1	353	9	16792	15.8565	1	0.39269
GOTERM_BP_DIRECT	GO:0008015~blood circulation	5	1.29534	0.0143893	HOXB2, F5, OLR1, MYOF, CXCL10	353	45	16792	5.28549	1	0.388922
GOTERM_BP_DIRECT	GO:0070372~regulation of ERK1 and ERK2 cascade	4	1.03627	0.0149254	FAM83D, CEACAM1, EPHA2, FN1	353	25	16792	7.6111	1	0.394715
GOTERM_BP_DIRECT	GO:0051591~response to cAMP	5	1.29534	0.0155059	SDC1, DUOX2, COL1A1, AREG, SPARC	353	46	16792	5.17059	1	0.401148
GOTERM_MF_DIRECT	GO:0001968~fibronectin binding	4	1.03627	0.015774	CTSK, ITGA3, IGFBP3, IGFBP5	348	26	16881	7.46286	0.999791	0.332055
GOTERM_BP_DIRECT	GO:0030335~positive regulation of cell migration	10	2.59067	0.0158411	BMP4, TNFAIP6, CEMIP, CEACAM6, LEF1, SEMA3C, LAMC2, COL1A1, SERPINB3, PLAU	353	184	16792	2.58529	1	0.402518
GOTERM_CC_DIRECT	GO:0031982~vesicle	8	2.07254	0.0171913	MUC1, KCNN4, TSPAN1, SLC6A14, SERPINB3, GPRC5A, MUC4, MUC16	378	128	18224	3.01323	0.992078	0.23569
GOTERM_CC_DIRECT	GO:0005913~cell-cell adherens junction	14	3.62694	0.0175242	S100P, BAIAP2L1, TRIM29, PFKP, S100A11, ANLN, SFN, CDH3, GPRC5A, EPHA2, JUP, PPL, CAPG, EPS8L1	378	323	18224	2.08967	0.992792	0.228648
GOTERM_MF_DIRECT	GO:0098641~cadherin binding involved in cell-cell adhesion	13	3.36788	0.0175551	S100P, BAIAP2L1, TRIM29, PFKP, S100A11, ANLN, SFN, GPRC5A, EPHA2, JUP, PPL, CAPG, EPS8L1	348	290	16881	2.17452	0.999921	0.348898
GOTERM_BP_DIRECT	GO:0034501~protein localization to kinetochore	3	0.777202	0.0176424	CDK1, TTK, BUB1B	353	10	16792	14.2708	1	0.431385
GOTERM_BP_DIRECT	GO:0055015~ventricular cardiac muscle cell development	3	0.777202	0.0176424	CCNB1, CDK1, FHL2	353	10	16792	14.2708	1	0.431385
GOTERM_CC_DIRECT	GO:0005737~cytoplasm	128	33.1606	0.0178057	STIL, CTHRC1, S100A6, TSPAN1, PRC1, CRABP2, TTK, POSTN, WNT2, CDCA7, CDKN2B, FAP, PLS1, MX1, NQO1, MX2, ASPM, NCF2, DTL, PTPRR, IFI44, TMSB10, SCEL, JUP, EPS8L3, EPS8L1, ODAM, IL1R2, RTP4, NEK2, RHPN2, OAS1, OAS2, IGF2BP3, TPRG1, NHS, MDK, TFF3, AHNAK2, ARNTL2, FGD6, SGIP1, MUC1, KLF5, PLAT, CRIP1, S100P, S100A16, MYO1E, LGALS1, IL1RN, S100A11, CDC20, S100A14, EPHA4, OASL, C1ORF116, TNFSF11, HOXB…	378	5222	18224	1.18175	0.993346	0.221688
GOTERM_BP_DIRECT	GO:0042476~odontogenesis	4	1.03627	0.0184078	BMP4, INHBA, SDC1, COL1A2	353	27	16792	7.04732	1	0.439885
GOTERM_MF_DIRECT	GO:0008083~growth factor activity	9	2.33161	0.0189691	MIA, BMP4, INHBA, DKK1, TFF1, AREG, MDK, MACC1, TIMP1	348	162	16881	2.69492	0.999963	0.358414
GOTERM_BP_DIRECT	GO:0071560~cellular response to transforming growth factor beta stimulus	5	1.29534	0.0191772	WNT5A, NOX4, WNT2, POSTN, COL1A1	353	49	16792	4.85402	1	0.448069
GOTERM_BP_DIRECT	GO:0010033~response to organic substance	4	1.03627	0.0203034	WNT5A, CRIP1, S100P, SQLE	353	28	16792	6.79563	1	0.461842
GOTERM_BP_DIRECT	GO:0090200~positive regulation of release of cytochrome c from mitochondria	4	1.03627	0.0203034	MMP9, BIK, PMAIP1, PLAUR	353	28	16792	6.79563	1	0.461842
GOTERM_BP_DIRECT	GO:0018149~peptide cross-linking	5	1.29534	0.0205102	SPRR1B, COL3A1, SPRR3, TGM2, FN1	353	50	16792	4.75694	1	0.460006
GOTERM_BP_DIRECT	GO:0048333~mesodermal cell differentiation	3	0.777202	0.0212674	INHBA, ITGA2, ITGA3	353	11	16792	12.9735	1	0.467067
GOTERM_BP_DIRECT	GO:0051764~actin crosslink formation	3	0.777202	0.0212674	BAIAP2L1, PLS1, DPYSL3	353	11	16792	12.9735	1	0.467067
GOTERM_BP_DIRECT	GO:0002576~platelet degranulation	7	1.81347	0.0212904	LGALS3BP, F5, PCDH7, SPARC, ECM1, FN1, TIMP1	353	103	16792	3.23287	1	0.462326
GOTERM_BP_DIRECT	GO:0048662~negative regulation of smooth muscle cell proliferation	4	1.03627	0.0223024	PPARG, NPR3, IGFBP3, IGFBP5	353	29	16792	6.5613	1	0.473037
GOTERM_BP_DIRECT	GO:0000281~mitotic cytokinesis	4	1.03627	0.0223024	NUSAP1, ANLN, CEP55, KIF20A	353	29	16792	6.5613	1	0.473037
GOTERM_MF_DIRECT	GO:0019901~protein kinase binding	15	3.88601	0.0242008	KIF14, KIF11, PRC1, TPX2, PTPRR, SFN, CAMK2N1, JUP, FAM83D, CCNB1, FAM83B, FAM83A, CDKN2B, CKS2, KIF20A	348	376	16881	1.93518	0.999998	0.419618
GOTERM_BP_DIRECT	GO:0048706~embryonic skeletal system development	4	1.03627	0.0244047	WNT5A, SULF2, SULF1, COL1A1	353	30	16792	6.34259	1	0.499148
GOTERM_BP_DIRECT	GO:0090004~positive regulation of establishment of protein localization to plasma membrane	4	1.03627	0.0244047	PLS1, ITGA3, AGR2, EPHA2	353	30	16792	6.34259	1	0.499148
GOTERM_MF_DIRECT	GO:0004175~endopeptidase activity	5	1.29534	0.0247979	FAP, MMP9, MMP3, MMP12, MMP1	348	54	16881	4.49154	0.999998	0.41454
GOTERM_MF_DIRECT	GO:0005254~chloride channel activity	5	1.29534	0.0247979	FXYD3, APOL1, CLIC3, ANO1, SLC26A9	348	54	16881	4.49154	0.999998	0.41454
GOTERM_BP_DIRECT	GO:0060394~negative regulation of pathway-restricted SMAD protein phosphorylation	3	0.777202	0.0251718	DKK1, GREM1, PMEPA1	353	12	16792	11.8924	1	0.50496
GOTERM_BP_DIRECT	GO:0051310~metaphase plate congression	3	0.777202	0.0251718	FAM83D, CENPF, NDC80	353	12	16792	11.8924	1	0.50496
GOTERM_CC_DIRECT	GO:0000922~spindle pole	7	1.81347	0.0257566	CCNB1, KIF11, PRC1, NEK2, TPX2, CENPF, CDC20	378	109	18224	3.09616	0.999311	0.292967
GOTERM_CC_DIRECT	GO:0000776~kinetochore	6	1.5544	0.0262984	NEK2, CENPF, TTK, CENPW, BUB1B, NDC80	378	81	18224	3.57123	0.99941	0.286787
GOTERM_BP_DIRECT	GO:0048146~positive regulation of fibroblast proliferation	5	1.29534	0.0264032	WNT5A, CCNB1, WNT2, S100A6, FN1	353	54	16792	4.40457	1	0.516854
GOTERM_BP_DIRECT	GO:0060548~negative regulation of cell death	5	1.29534	0.0280189	BMP4, WISP1, HTR2B, AGR3, AGR2	353	55	16792	4.32449	1	0.533131
GOTERM_BP_DIRECT	GO:0071356~cellular response to tumor necrosis factor	7	1.81347	0.028292	LCN2, TNFRSF21, CCL20, POSTN, COL1A1, ADAMTS12, CCL18	353	110	16792	3.02714	1	0.531658
GOTERM_MF_DIRECT	GO:0042803~protein homodimerization activity	24	6.21762	0.0284615	XDH, S100A6, OLFM4, KYNU, S100A16, LGALS1, S100A11, TTK, CENPF, S100A10, NPR3, ECT2, LCN2, JUP, ID1, FAP, CTSE, MGLL, CEACAM5, BHLHE40, TOP2A, AGR2, MUC13, CEACAM1	348	730	16881	1.5948	1	0.446738
GOTERM_BP_DIRECT	GO:0043568~positive regulation of insulin-like growth factor receptor signaling pathway	3	0.777202	0.0293422	CDH3, IGFBP3, IGFBP5	353	13	16792	10.9776	1	0.53992
GOTERM_MF_DIRECT	GO:0048306~calcium-dependent protein binding	5	1.29534	0.0312317	S100A4, S100A6, S100P, S100A11, ANXA3	348	58	16881	4.18178	1	0.465471
GOTERM_MF_DIRECT	GO:0005198~structural molecule activity	11	2.84974	0.0326404	JUP, CLDN18, KRT19, KRT6A, LAMB3, LAMA3, KRT16, SPRR1B, KRT7, SPRR3, KRT23	348	247	16881	2.1603	1	0.468312
GOTERM_CC_DIRECT	GO:0005925~focal adhesion	15	3.88601	0.0337525	NOX4, EFNB2, FERMT1, FHL2, ITGA2, ITGA3, NHS, EPHA2, PLAUR, JUP, SDC1, FAP, TGM2, PLAU, ADAM9	378	391	18224	1.84955	0.999931	0.340651
GOTERM_BP_DIRECT	GO:0002009~morphogenesis of an epithelium	3	0.777202	0.033766	KRT6A, SERPINB5, KRT16	353	14	16792	10.1934	1	0.586597
GOTERM_BP_DIRECT	GO:0010812~negative regulation of cell-substrate adhesion	3	0.777202	0.033766	LGALS1, SPOCK1, COL1A1	353	14	16792	10.1934	1	0.586597
GOTERM_BP_DIRECT	GO:0010839~negative regulation of keratinocyte proliferation	3	0.777202	0.033766	EFNB2, CD109, SFN	353	14	16792	10.1934	1	0.586597
GOTERM_BP_DIRECT	GO:0032461~positive regulation of protein oligomerization	3	0.777202	0.033766	PMAIP1, MMP3, MMP1	353	14	16792	10.1934	1	0.586597
GOTERM_CC_DIRECT	GO:0000777~condensed chromosome kinetochore	6	1.5544	0.0343614	NEK2, NUF2, CENPW, BUB1B, NDC80, CENPK	378	87	18224	3.32494	0.999942	0.334007
GOTERM_BP_DIRECT	GO:0051216~cartilage development	5	1.29534	0.0350609	WNT5A, SULF2, SULF1, COL10A1, TIMP1	353	59	16792	4.03131	1	0.595694
GOTERM_BP_DIRECT	GO:0002063~chondrocyte development	3	0.777202	0.0384306	SULF2, SULF1, COL11A1	353	15	16792	9.51388	1	0.625162
GOTERM_BP_DIRECT	GO:0007507~heart development	9	2.33161	0.0400012	EDNRA, CRIP1, ID1, COL3A1, PPARG, HOPX, ITGA3, SPARC, HTR2B	353	183	16792	2.33948	1	0.635386
GOTERM_CC_DIRECT	GO:0005887~integral component of plasma membrane	40	10.3627	0.0408264	TNFRSF21, FXYD3, TSPAN1, TSPAN8, GPR87, FXYD5, GPRC5A, EDNRA, COL17A1, LY6E, SLC24A3, IL1RAP, SLC2A1, CEACAM6, B3GNT3, CEACAM5, CEACAM1, LY75, MUC1, TNFSF4, OLR1, EFNB2, MET, SLC6A14, PCDH7, NPR3, KCNK1, EPHA2, PLAUR, MUC4, SLCO1B3, EPHA4, CD55, VSIG2, SDC1, SLC16A4, TNFSF11, SLC26A9, MST1R, HTR2B	378	1415	18224	1.36287	0.999991	0.371981
GOTERM_CC_DIRECT	GO:0005584~collagen type I trimer	2	0.518135	0.0409472	COL1A2, COL1A1	378	2	18224	48.2116	0.999991	0.361507
GOTERM_BP_DIRECT	GO:1903225~negative regulation of endodermal cell differentiation	2	0.518135	0.0414865	COL5A2, COL5A1	353	2	16792	47.5694	1	0.644333
GOTERM_BP_DIRECT	GO:1900020~positive regulation of protein kinase C activity	2	0.518135	0.0414865	WNT5A, CEMIP	353	2	16792	47.5694	1	0.644333
GOTERM_BP_DIRECT	GO:0097325~melanocyte proliferation	2	0.518135	0.0414865	WNT5A, FAP	353	2	16792	47.5694	1	0.644333
GOTERM_BP_DIRECT	GO:0071306~cellular response to vitamin E	2	0.518135	0.0414865	PPARG, COL1A1	353	2	16792	47.5694	1	0.644333
GOTERM_BP_DIRECT	GO:0048285~organelle fission	2	0.518135	0.0414865	MX1, MX2	353	2	16792	47.5694	1	0.644333
GOTERM_BP_DIRECT	GO:0014846~esophagus smooth muscle contraction	2	0.518135	0.0414865	SULF2, SULF1	353	2	16792	47.5694	1	0.644333
GOTERM_BP_DIRECT	GO:0021873~forebrain neuroblast division	2	0.518135	0.0414865	LEF1, ASPM	353	2	16792	47.5694	1	0.644333
GOTERM_MF_DIRECT	GO:0048018~receptor agonist activity	3	0.777202	0.0418144	WNT5A, WNT2, GREM1	348	16	16881	9.09537	1	0.543903
GOTERM_BP_DIRECT	GO:0032355~response to estradiol	6	1.5544	0.0424289	IFI27, POSTN, COL1A1, AREG, NQO1, GJB2	353	91	16792	3.13644	1	0.648086
GOTERM_BP_DIRECT	GO:2000117~negative regulation of cysteine-type endopeptidase activity	3	0.777202	0.0433242	CST6, CST2, CST1	353	16	16792	8.91926	1	0.651308
GOTERM_BP_DIRECT	GO:0007051~spindle organization	3	0.777202	0.0433242	KIF11, TTK, ASPM	353	16	16792	8.91926	1	0.651308
GOTERM_BP_DIRECT	GO:1902476~chloride transmembrane transport	6	1.5544	0.0458717	FXYD3, APOL1, CLIC3, ANO1, SLC26A9, GABRP	353	93	16792	3.06899	1	0.668194
GOTERM_BP_DIRECT	GO:0060326~cell chemotaxis	5	1.29534	0.0473786	CXCL5, CCL20, LEF1, EPHA2, CXCL10	353	65	16792	3.65919	1	0.675811
GOTERM_BP_DIRECT	GO:0048704~embryonic skeletal system morphogenesis	4	1.03627	0.0479156	HOXB2, HOXB7, HOXB6, COL11A1	353	39	16792	4.87891	1	0.675603
GOTERM_BP_DIRECT	GO:0032331~negative regulation of chondrocyte differentiation	3	0.777202	0.0484352	BMP4, ADAMTS12, GREM1	353	17	16792	8.3946	1	0.675267
GOTERM_MF_DIRECT	GO:0004866~endopeptidase inhibitor activity	4	1.03627	0.0486372	PI3, CD109, SLPI, WFDC2	348	40	16881	4.85086	1	0.587633
GOTERM_BP_DIRECT	GO:0006821~chloride transport	4	1.03627	0.0510244	FXYD3, CLIC3, ANO1, SLC26A9	353	40	16792	4.75694	1	0.690414
GOTERM_CC_DIRECT	GO:0005886~plasma membrane	100	25.9067	0.051422	TSPAN1, PRC1, SLC44A4, WNT2, MALL, FAP, TGFBI, SLC2A1, EFNB2, PTPRR, PLAUR, JUP, KRT19, VSIG1, F5, PSCA, EFNA5, MST1R, WNT5A, IL1R2, OLFM4, FXYD3, ASAP2, PPL, MSLN, AHNAK2, SGIP1, GABRP, ADAM28, KLF5, S100A16, OSBPL3, LGALS4, MET, IL1RN, SLC6A14, ITGA2, ITGA3, KCNK1, S100A14, EPHA2, EPHA4, CD55, TNFSF11, LAMP5, DSG3, HEPH, RHBDL2, SYTL2, ANTXR1, PLAU, IFI6, ANO1, DUOX2, EDNRA, SLC24A3, IL1RAP, CE…	378	4121	18224	1.1699	1	0.420453
GOTERM_MF_DIRECT	GO:0005520~insulin-like growth factor binding	3	0.777202	0.051906	WISP1, ESM1, IGFBP3	348	18	16881	8.08477	1	0.600061
GOTERM_MF_DIRECT	GO:0008301~DNA binding, bending	3	0.777202	0.051906	CRIP1, LEF1, TOP2A	348	18	16881	8.08477	1	0.600061
GOTERM_BP_DIRECT	GO:0006915~apoptotic process	19	4.92228	0.0534742	TNFRSF21, CDK1, LGALS1, EGLN3, TPX2, PMAIP1, GREM1, S100A14, LCN2, CDCA7, COMP, SULF1, BUB1B, BIK, EFNA5, XAF1, MX1, IGFBP3, MELK	353	567	16792	1.59404	1	0.703611
GOTERM_BP_DIRECT	GO:0001938~positive regulation of endothelial cell proliferation	5	1.29534	0.0567593	WNT5A, WNT2, BMP4, HTR2B, ECM1	353	69	16792	3.44706	1	0.721449
GOTERM_BP_DIRECT	GO:0071300~cellular response to retinoic acid	5	1.29534	0.0592492	MUC1, WNT5A, WNT2, PPARG, COL1A1	353	70	16792	3.39781	1	0.733076
GOTERM_BP_DIRECT	GO:0030855~epithelial cell differentiation	5	1.29534	0.0592492	MUC1, CDK1, PPARG, DHRS9, SPINK5	353	70	16792	3.39781	1	0.733076
GOTERM_MF_DIRECT	GO:0005152~interleukin-1 receptor antagonist activity	2	0.518135	0.0604115	PXDN, IL1RN	348	3	16881	32.3391	1	0.645804
GOTERM_MF_DIRECT	GO:0008449~N-acetylglucosamine-6-sulfatase activity	2	0.518135	0.0604115	SULF2, SULF1	348	3	16881	32.3391	1	0.645804
GOTERM_CC_DIRECT	GO:0005610~laminin-5 complex	2	0.518135	0.0607893	LAMB3, LAMA3	378	3	18224	32.1411	1	0.464693
GOTERM_CC_DIRECT	GO:0005588~collagen type V trimer	2	0.518135	0.0607893	COL5A2, COL5A1	378	3	18224	32.1411	1	0.464693
GOTERM_CC_DIRECT	GO:0016942~insulin-like growth factor binding protein complex	2	0.518135	0.0607893	IGFBP3, IGFBP5	378	3	18224	32.1411	1	0.464693
GOTERM_BP_DIRECT	GO:0002158~osteoclast proliferation	2	0.518135	0.0615816	TNFSF11, NPR3	353	3	16792	31.7129	1	0.74309
GOTERM_BP_DIRECT	GO:0030201~heparan sulfate proteoglycan metabolic process	2	0.518135	0.0615816	SULF2, SULF1	353	3	16792	31.7129	1	0.74309
GOTERM_BP_DIRECT	GO:0035989~tendon development	2	0.518135	0.0615816	COL11A1, COL5A1	353	3	16792	31.7129	1	0.74309
GOTERM_BP_DIRECT	GO:1903385~regulation of homophilic cell adhesion	2	0.518135	0.0615816	PTPRR, CEACAM1	353	3	16792	31.7129	1	0.74309
GOTERM_BP_DIRECT	GO:0071847~TNFSF11-mediated signaling pathway	2	0.518135	0.0615816	CLDN18, TNFSF11	353	3	16792	31.7129	1	0.74309
GOTERM_BP_DIRECT	GO:0048592~eye morphogenesis	2	0.518135	0.0615816	COL5A2, COL5A1	353	3	16792	31.7129	1	0.74309
GOTERM_BP_DIRECT	GO:0021957~corticospinal tract morphogenesis	2	0.518135	0.0615816	EPHA4, CDH11	353	3	16792	31.7129	1	0.74309
GOTERM_BP_DIRECT	GO:0070098~chemokine-mediated signaling pathway	5	1.29534	0.0617965	CXCL5, CCL20, TFF2, CCL18, CXCL10	353	71	16792	3.34996	1	0.740441
GOTERM_BP_DIRECT	GO:0060333~interferon-gamma-mediated signaling pathway	5	1.29534	0.0617965	OASL, TRIM31, OAS1, OAS2, GBP2	353	71	16792	3.34996	1	0.740441
GOTERM_BP_DIRECT	GO:0051436~negative regulation of ubiquitin-protein ligase activity involved in mitotic cell cycle	5	1.29534	0.0617965	CCNB1, CDK1, BUB1B, CDC20, UBE2C	353	71	16792	3.34996	1	0.740441
GOTERM_CC_DIRECT	GO:0005876~spindle microtubule	4	1.03627	0.0624183	CDK1, KIF11, PRC1, NUSAP1	378	44	18224	4.38288	1	0.462091
GOTERM_BP_DIRECT	GO:0007094~mitotic spindle assembly checkpoint	3	0.777202	0.0649618	CENPF, TTK, BUB1B	353	20	16792	7.13541	1	0.75454
GOTERM_BP_DIRECT	GO:0014911~positive regulation of smooth muscle cell migration	3	0.777202	0.0649618	NOX4, ITGA2, POSTN	353	20	16792	7.13541	1	0.75454
GOTERM_BP_DIRECT	GO:0042326~negative regulation of phosphorylation	3	0.777202	0.0649618	BMP4, INHBA, CDKN2B	353	20	16792	7.13541	1	0.75454
GOTERM_BP_DIRECT	GO:0007062~sister chromatid cohesion	6	1.5544	0.0655178	NUF2, CENPF, BUB1B, NDC80, CDC20, CENPK	353	103	16792	2.77103	1	0.753811
GOTERM_BP_DIRECT	GO:0050729~positive regulation of inflammatory response	5	1.29534	0.0670617	WNT5A, TNFSF4, TGM2, ITGA2, CCL18	353	73	16792	3.25818	1	0.758387
GOTERM_MF_DIRECT	GO:0008017~microtubule binding	9	2.33161	0.0671875	KIF14, FAM83D, KIF11, PRC1, NUSAP1, MX1, MX2, SGIP1, KIF20A	348	208	16881	2.09893	1	0.674813
GOTERM_BP_DIRECT	GO:0000086~G2/M transition of mitotic cell cycle	7	1.81347	0.0686741	CCNB1, CDK1, CDKN2B, NEK2, TPX2, MELK, HMMR	353	137	16792	2.43055	1	0.76315
GOTERM_CC_DIRECT	GO:0001533~cornified envelope	4	1.03627	0.0694537	CST6, SPRR1B, SPRR3, SCEL	378	46	18224	4.19232	1	0.488008
GOTERM_BP_DIRECT	GO:0030334~regulation of cell migration	5	1.29534	0.0697789	KIF14, MMP10, LAMA3, DPYSL3, CEACAM1	353	74	16792	3.21415	1	0.765182
GOTERM_BP_DIRECT	GO:0051091~positive regulation of sequence-specific DNA binding transcription factor activity	6	1.5544	0.0699325	WNT2, JUP, TNFSF11, TRIM31, PPARG, ANXA3	353	105	16792	2.71825	1	0.76239
GOTERM_BP_DIRECT	GO:0045087~innate immune response	15	3.88601	0.0703474	NCF2, PPARG, LCN2, STYK1, CD55, APOL1, KRT16, DDX60, TRIM31, IL1RAP, SLPI, MST1R, TREM1, MX1, MX2	353	430	16792	1.6594	1	0.760945
GOTERM_BP_DIRECT	GO:0001666~response to hypoxia	8	2.07254	0.07061	EDNRA, PLAT, MUC1, NOX4, EGLN3, ITGA2, POSTN, PLAU	353	172	16792	2.21253	1	0.758756
GOTERM_BP_DIRECT	GO:0010595~positive regulation of endothelial cell migration	4	1.03627	0.0716331	WNT5A, BMP4, SPARC, ANXA3	353	46	16792	4.13647	1	0.760393
GOTERM_BP_DIRECT	GO:0042552~myelination	4	1.03627	0.0716331	KLK6, TNFRSF21, MALL, MAL2	353	46	16792	4.13647	1	0.760393
GOTERM_MF_DIRECT	GO:0004601~peroxidase activity	3	0.777202	0.0743066	PXDN, DUOX2, GPX8	348	22	16881	6.61481	1	0.701926
GOTERM_BP_DIRECT	GO:0071230~cellular response to amino acid stimulus	4	1.03627	0.0753802	COL3A1, COL1A2, COL1A1, COL5A2	353	47	16792	4.04846	1	0.77495
GOTERM_BP_DIRECT	GO:0051437~positive regulation of ubiquitin-protein ligase activity involved in regulation of mitotic cell cycle transition	5	1.29534	0.0753805	CCNB1, CDK1, BUB1B, CDC20, UBE2C	353	76	16792	3.12957	1	0.771603
GOTERM_BP_DIRECT	GO:0045453~bone resorption	3	0.777202	0.0768705	NOX4, CTSK, TNFSF11	353	22	16792	6.48674	1	0.775141
GOTERM_BP_DIRECT	GO:0010906~regulation of glucose metabolic process	3	0.777202	0.0768705	TFF3, IGFBP3, IGFBP5	353	22	16792	6.48674	1	0.775141
GOTERM_BP_DIRECT	GO:0060045~positive regulation of cardiac muscle cell proliferation	3	0.777202	0.0768705	CCNB1, WNT2, CDK1	353	22	16792	6.48674	1	0.775141
GOTERM_MF_DIRECT	GO:0008009~chemokine activity	4	1.03627	0.0794385	CXCL5, CCL20, CCL18, CXCL10	348	49	16881	3.95989	1	0.716485
GOTERM_MF_DIRECT	GO:0035173~histone kinase activity	2	0.518135	0.0797288	CCNB1, CDK1	348	4	16881	24.2543	1	0.707751
GOTERM_CC_DIRECT	GO:0031262~Ndc80 complex	2	0.518135	0.0802219	NUF2, NDC80	378	4	18224	24.1058	1	0.528863
GOTERM_CC_DIRECT	GO:0000942~condensed nuclear chromosome outer kinetochore	2	0.518135	0.0802219	CCNB1, NDC80	378	4	18224	24.1058	1	0.528863
GOTERM_CC_DIRECT	GO:1990357~terminal web	2	0.518135	0.0802219	KRT19, PLS1	378	4	18224	24.1058	1	0.528863
GOTERM_CC_DIRECT	GO:0042567~insulin-like growth factor ternary complex	2	0.518135	0.0802219	IGFBP3, IGFBP5	378	4	18224	24.1058	1	0.528863
GOTERM_CC_DIRECT	GO:0097209~epidermal lamellar body	2	0.518135	0.0802219	KLK7, SPINK5	378	4	18224	24.1058	1	0.528863
GOTERM_CC_DIRECT	GO:0034707~chloride channel complex	4	1.03627	0.0806423	FXYD3, CLIC3, ANO1, GABRP	378	49	18224	3.93564	1	0.519569
GOTERM_CC_DIRECT	GO:0005680~anaphase-promoting complex	3	0.777202	0.0812059	BUB1B, CDC20, UBE2C	378	23	18224	6.28847	1	0.511318
GOTERM_BP_DIRECT	GO:0038001~paracrine signaling	2	0.518135	0.0812566	TNFSF11, SERPINB3	353	4	16792	23.7847	1	0.791077
GOTERM_BP_DIRECT	GO:0060750~epithelial cell proliferation involved in mammary gland duct elongation	2	0.518135	0.0812566	WNT5A, AREG	353	4	16792	23.7847	1	0.791077
GOTERM_BP_DIRECT	GO:0090191~negative regulation of branching involved in ureteric bud morphogenesis	2	0.518135	0.0812566	BMP4, GREM1	353	4	16792	23.7847	1	0.791077
GOTERM_BP_DIRECT	GO:0046602~regulation of mitotic centrosome separation	2	0.518135	0.0812566	KIF11, NEK2	353	4	16792	23.7847	1	0.791077
GOTERM_BP_DIRECT	GO:2000660~negative regulation of interleukin-1-mediated signaling pathway	2	0.518135	0.0812566	IL1R2, IL1RN	353	4	16792	23.7847	1	0.791077
GOTERM_BP_DIRECT	GO:1901509~regulation of endothelial tube morphogenesis	2	0.518135	0.0812566	ADAMTS12, CXCL10	353	4	16792	23.7847	1	0.791077
GOTERM_BP_DIRECT	GO:0001836~release of cytochrome c from mitochondria	3	0.777202	0.0830627	PMAIP1, SFN, IFI6	353	23	16792	6.20471	1	0.795409
GOTERM_BP_DIRECT	GO:0031145~anaphase-promoting complex-dependent catabolic process	5	1.29534	0.0841935	CCNB1, CDK1, BUB1B, CDC20, UBE2C	353	79	16792	3.01072	1	0.796887
GOTERM_CC_DIRECT	GO:0005882~intermediate filament	6	1.5544	0.0854922	JUP, KRT19, KRT6A, KRT16, KRT7, KRT23	378	113	18224	2.55991	1	0.519705
GOTERM_CC_DIRECT	GO:0030057~desmosome	3	0.777202	0.0874174	JUP, DSG3, PPL	378	24	18224	6.02646	1	0.517705
GOTERM_BP_DIRECT	GO:0071222~cellular response to lipopolysaccharide	6	1.5544	0.0891803	WNT5A, LCN2, TNFSF4, CCL20, ADAM9, CXCL10	353	113	16792	2.52581	1	0.813062
GOTERM_BP_DIRECT	GO:0045742~positive regulation of epidermal growth factor receptor signaling pathway	3	0.777202	0.0894014	MMP9, AGR2, PLAUR	353	24	16792	5.94618	1	0.810927
GOTERM_BP_DIRECT	GO:0042542~response to hydrogen peroxide	4	1.03627	0.0912011	SDC1, COL1A1, AREG, ADAM9	353	51	16792	3.73093	1	0.814567
GOTERM_BP_DIRECT	GO:0034097~response to cytokine	4	1.03627	0.0953557	IFI27, COL3A1, SPARC, TIMP1	353	52	16792	3.65919	1	0.826156
GOTERM_BP_DIRECT	GO:0000070~mitotic sister chromatid segregation	3	0.777202	0.0958776	NEK2, NUSAP1, NDC80	353	25	16792	5.70833	1	0.825124
GOTERM_BP_DIRECT	GO:0060135~maternal process involved in female pregnancy	3	0.777202	0.0958776	IFI27, MMP7, ITGA3	353	25	16792	5.70833	1	0.825124
GOTERM_BP_DIRECT	GO:0002227~innate immune response in mucosa	3	0.777202	0.0958776	BPIFB1, HIST1H2BD, HIST2H2BE	353	25	16792	5.70833	1	0.825124
GOTERM_BP_DIRECT	GO:0006919~activation of cysteine-type endopeptidase activity involved in apoptotic process	5	1.29534	0.096688	XDH, IFI27, PPARG, EGLN3, PMAIP1	353	83	16792	2.86563	1	0.825065
GOTERM_BP_DIRECT	GO:0060070~canonical Wnt signaling pathway	5	1.29534	0.096688	WNT5A, WNT2, SDC1, LEF1, CDH3	353	83	16792	2.86563	1	0.825065
GOTERM_BP_DIRECT	GO:0042127~regulation of cell proliferation	8	2.07254	0.096821	JUP, TNFRSF21, STYK1, CDCA7, EGLN3, S100A11, PLAU, CXCL10	353	185	16792	2.05706	1	0.822765
GOTERM_MF_DIRECT	GO:0032813~tumor necrosis factor receptor superfamily binding	2	0.518135	0.0986501	TNFSF4, TNFSF11	348	5	16881	19.4034	1	0.776014
GOTERM_MF_DIRECT	GO:0046875~ephrin receptor binding	3	0.777202	0.099165	EPHA4, EFNB2, EFNA5	348	26	16881	5.59715	1	0.768879
A, Upregulated genes
Category	Term	Count	%	P-value	Genes	List Total	Pop Hits	Pop Total	Fold Enrichment	Bonferroni	Benjamini
GOTERM_CC_DIRECT	GO:0005615~extracellular space	54	23.0769	3.9194e-14	NRG4, FAM3B, ANPEP, DLK1, CXCL12, TTR, AZGP1, REG3A, SPX, SERPINA6, IAPP, PPP1R1A, SERPINA5, PLA2G1B, CPA2, APOH, CPA1, PRSS3P2, DPEP1, F11, CELA3A, CELA3B, ATP4A, CTRB2, F8, AMBP, CHGA, CD36, NUCB2, GC, C5, CLU, ALB, PRSS2, PRSS3, ANGPTL1, EGF, PTX3, PLTP, CTRL, DPT, PNLIPRP1, PNLIPRP2, SERPINI1, ADIPOQ, SERPINI2, SFRP5, CEL, GDF10, CELA2B, CELA2A, CPB1, IGFBP2, SST	229	1347	18224	3.19032	7.68141e-12	7.68141e-12
GOTERM_CC_DIRECT	GO:0070062~extracellular exosome	74	31.6239	2.3672e-10	ARSE, FAM3B, KIAA1324, ANPEP, AQP1, TTN, CXCL12, TTR, AZGP1, ART3, PRKAR2B, SERPINA6, SERPINA5, GP2, APOH, TRPV6, FAM129A, SLC4A4, DPEP1, COCH, F11, GATM, PEBP4, LIFR, CFTR, CYB5A, SLC3A1, AMBP, CLPS, CTH, BTG2, NUCB2, ABAT, CA4, GC, FXYD2, C7, TPST2, C6, C5, CLU, PBLD, REG1B, REG1A, ALB, PRSS3, ANGPTL1, SLC39A5, FGL1, EGF, DPT, GSTA1, GSTA2, HPN, GSTA3, TRHDE, PM20D1, EPHX2, KLK1, SERPINI1, ADIP…	229	2811	18224	2.09498	4.63971e-08	2.31985e-08
GOTERM_CC_DIRECT	GO:0005576~extracellular region	47	20.0855	8.35026e-08	GC, PNLIP, C7, NRG4, C6, FAM3B, C5, CLU, TTN, CXCL12, NRCAM, TTR, AZGP1, IAPP, ALB, SERPINA5, PRSS2, CTRC, GP2, PRSS3, CPA2, APOH, PLA2G1B, RGN, REG3G, MUC15, FAM150B, PTX3, EGF, PLTP, F11, PNLIPRP1, PNLIPRP2, CTRB2, F8, ADIPOQ, AMBP, CEL, DNASE1, SCGN, CLPS, CHRDL1, CHST9, CELA2B, GPHA2, IGFBP2, SST	229	1610	18224	2.32317	1.63664e-05	5.45549e-06
GOTERM_BP_DIRECT	GO:0007586~digestion	10	4.2735	1.10074e-07	CELA3A, CLPS, PNLIPRP2, CCKBR, PRSS2, CTRB2, PRSS3, SST, PRSS3P2, CTRL	218	63	16792	12.2266	0.000136923	0.000136923
GOTERM_BP_DIRECT	GO:0006508~proteolysis	24	10.2564	1.43039e-07	F11, CELA3A, HPN, CELA3B, TRHDE, ADAMTSL3, CTRB2, PM20D1, DPP10, F8, ANPEP, KLK1, CTRC, PRSS2, BACE1, PRSS3, CPA2, CELA2B, CELA2A, CPA1, CPB1, PRSS3P2, DPEP1, CTRL	218	500	16792	3.69732	0.000177925	8.89664e-05
GOTERM_BP_DIRECT	GO:0071294~cellular response to zinc ion	6	2.5641	3.45285e-06	MT1M, MT1H, MT1X, MT1G, KCNK3, MT1F	218	19	16792	24.3245	0.00428614	0.00143076
GOTERM_CC_DIRECT	GO:0030658~transport vesicle membrane	7	2.99145	7.09246e-06	SCGN, CHGA, SYCN, CA4, CUZD1, RAB26, SLC30A8	229	38	18224	14.6596	0.00138916	0.000347472
GOTERM_BP_DIRECT	GO:0006810~transport	17	7.26496	1.24036e-05	FXYD2, RBP1, ATP4A, AQP8, CFTR, CRAT, TMED6, TTR, LYVE1, P2RX1, ALB, SLC7A2, SERPINA6, FABP4, SLC4A4, PDZK1, SLC25A15	218	348	16792	3.76284	0.0153118	0.00385012
GOTERM_CC_DIRECT	GO:0005887~integral component of plasma membrane	38	16.2393	1.45426e-05	KCNJ16, SLC38A5, AQP8, SLC16A10, SLC16A12, KIAA1324, TSPAN7, ANPEP, AQP1, NRCAM, ART3, TRPV6, SLC39A5, SLC4A4, SLC43A1, HPN, TRHDE, KLB, ATP4A, CCKBR, PTGER4, FLT3, LIFR, SLC3A1, NPY1R, KCNK3, CEL, LYVE1, CD36, SEMA6D, P2RX1, CHRM3, SLC17A4, SLC7A2, BACE1, NPHS1, NTRK2, LRMP	229	1415	18224	2.13715	0.00284632	0.000569913
GOTERM_MF_DIRECT	GO:0004252~serine-type endopeptidase activity	14	5.98291	2.22071e-05	F11, CELA3A, HPN, CELA3B, CTRB2, F8, KLK1, CTRC, PRSS2, PRSS3, CELA2B, CELA2A, PRSS3P2, CTRL	214	255	16881	4.33084	0.0096137	0.0096137
GOTERM_MF_DIRECT	GO:0030170~pyridoxal phosphate binding	7	2.99145	7.98219e-05	BCAT1, CTH, ALB, GCAT, ABAT, GPT2, CBS	214	57	16881	9.68741	0.034128	0.0172121
GOTERM_BP_DIRECT	GO:0045926~negative regulation of growth	5	2.13675	9.02846e-05	MT1M, MT1H, MT1X, MT1G, MT1F	218	19	16792	20.2704	0.106241	0.0222134
GOTERM_BP_DIRECT	GO:0008217~regulation of blood pressure	7	2.99145	0.000190175	ACSM3, SGK1, CHGA, TRHDE, P2RX1, EPHX2, NPY1R	218	65	16792	8.29527	0.210693	0.038666
GOTERM_MF_DIRECT	GO:0015171~amino acid transmembrane transporter activity	6	2.5641	0.000304167	SLC38A5, SLC1A2, SLC16A10, SLC7A2, SLC3A1, SLC43A1	214	47	16881	10.0702	0.123951	0.0431522
GOTERM_CC_DIRECT	GO:0016323~basolateral plasma membrane	10	4.2735	0.000450534	KCNJ16, FXYD2, CHRM3, SLC16A10, SLC41A1, CA4, CFTR, SLC39A5, SLC4A4, AQP1	229	180	18224	4.42115	0.0845364	0.014613
GOTERM_BP_DIRECT	GO:0044241~lipid digestion	4	1.7094	0.000553202	PNLIP, CEL, CLPS, PNLIPRP2	218	13	16792	23.7008	0.497608	0.0936585
GOTERM_MF_DIRECT	GO:0003824~catalytic activity	10	4.2735	0.000650861	BCAT1, ACSM3, CEL, TDH, EPHX2, GCAT, ECHDC3, SLC3A1, GPT2, PBLD	214	188	16881	4.19591	0.246643	0.0683557
GOTERM_BP_DIRECT	GO:0006865~amino acid transport	5	2.13675	0.00103744	SLC38A5, SLC16A10, SLC7A2, SLC3A1, SLC43A1	218	35	16792	11.0039	0.725072	0.149053
GOTERM_MF_DIRECT	GO:0004806~triglyceride lipase activity	4	1.7094	0.00118196	PNLIP, CEL, PNLIPRP1, PNLIPRP2	214	17	16881	18.5607	0.402175	0.0977752
GOTERM_MF_DIRECT	GO:0008236~serine-type peptidase activity	6	2.5641	0.0011841	HPN, SEC11C, PRSS2, CTRB2, PRSS3, DPP10	214	63	16881	7.51268	0.402732	0.0823123
GOTERM_BP_DIRECT	GO:0071276~cellular response to cadmium ion	4	1.7094	0.00126607	MT1H, MT1X, MT1G, MT1F	218	17	16792	18.1241	0.793196	0.160635
GOTERM_BP_DIRECT	GO:0008152~metabolic process	9	3.84615	0.0015539	GSTA1, BCAT1, ACSM3, GSTA2, GSTA3, ARSE, EPHX2, ECHDC3, UGT2A3	218	168	16792	4.12647	0.855511	0.175893
GOTERM_BP_DIRECT	GO:0006520~cellular amino acid metabolic process	5	2.13675	0.00172187	SLC7A2, PM20D1, GCAT, SLC3A1, SLC25A15	218	40	16792	9.62844	0.882797	0.177079
GOTERM_CC_DIRECT	GO:0030667~secretory granule membrane	4	1.7094	0.00217616	SYCN, CA4, RAB26, SLC30A8	229	21	18224	15.1582	0.347531	0.0591756
GOTERM_BP_DIRECT	GO:0002576~platelet degranulation	7	2.99145	0.00219495	CD36, ALB, CLU, F8, APOH, EGF, TTN	218	103	16792	5.23488	0.93501	0.203711
GOTERM_CC_DIRECT	GO:0045177~apical part of cell	6	2.5641	0.00248721	CD36, AQP8, EPB41L4B, AQP1, HOMER2, DPEP1	229	75	18224	6.36646	0.386209	0.0591885
GOTERM_CC_DIRECT	GO:0005579~membrane attack complex	3	1.28205	0.00313996	C7, C6, C5	229	7	18224	34.1061	0.460115	0.0661961
GOTERM_CC_DIRECT	GO:0031526~brush border membrane	5	2.13675	0.00376375	CD36, CA4, SLC3A1, AQP1, PDZK1	229	51	18224	7.80204	0.52245	0.0712435
GOTERM_BP_DIRECT	GO:0071320~cellular response to cAMP	5	2.13675	0.00452217	AQP8, AKAP7, CFTR, AQP1, ADIPOQ	218	52	16792	7.40649	0.996441	0.351905
GOTERM_BP_DIRECT	GO:0010951~negative regulation of endopeptidase activity	7	2.99145	0.0048752	AMBP, SERPINA6, SERPINA5, C5, SERPINI1, TFPI2, SERPINI2	218	121	16792	4.45614	0.997711	0.352254
GOTERM_BP_DIRECT	GO:0010107~potassium ion import	4	1.7094	0.0054946	KCNJ16, KCNJ5, ATP4A, KCNJ8	218	28	16792	11.0039	0.998945	0.366783
GOTERM_BP_DIRECT	GO:0030299~intestinal cholesterol absorption	3	1.28205	0.00563708	PNLIP, CEL, CD36	218	9	16792	25.6758	0.999117	0.355656
GOTERM_BP_DIRECT	GO:1990573~potassium ion import across plasma membrane	3	1.28205	0.00563708	KCNJ5, FXYD2, KCNJ8	218	9	16792	25.6758	0.999117	0.355656
GOTERM_BP_DIRECT	GO:0009612~response to mechanical stimulus	5	2.13675	0.00708889	PTGER4, BTG2, FOSB, IGFBP2, CXCL12	218	59	16792	6.52776	0.999857	0.405829
GOTERM_MF_DIRECT	GO:0004867~serine-type endopeptidase inhibitor activity	6	2.5641	0.00769784	AMBP, SERPINA6, SERPINA5, SERPINI1, TFPI2, SERPINI2	214	97	16881	4.87937	0.965317	0.381351
GOTERM_BP_DIRECT	GO:0042632~cholesterol homeostasis	5	2.13675	0.00941546	ACSM3, TMEM97, EPHX2, FABP4, NR5A2	218	64	16792	6.01778	0.999992	0.479932
GOTERM_BP_DIRECT	GO:0006641~triglyceride metabolic process	4	1.7094	0.0102756	CEL, PNLIPRP2, APOH, SEL1L	218	35	16792	8.80315	0.999997	0.491485
GOTERM_BP_DIRECT	GO:0072593~reactive oxygen species metabolic process	4	1.7094	0.0102756	AOX1, PDK4, EPHX2, BNIP3	218	35	16792	8.80315	0.999997	0.491485
GOTERM_CC_DIRECT	GO:0016324~apical plasma membrane	10	4.2735	0.0112481	HPN, CD36, SLC17A4, CA4, AKAP7, CFTR, IGFBP2, AQP1, PDZK1, DPEP1	229	291	18224	2.73473	0.891077	0.182542
GOTERM_MF_DIRECT	GO:0008483~transaminase activity	3	1.28205	0.0112788	ABAT, PSAT1, GPT2	214	13	16881	18.2038	0.992803	0.460315
GOTERM_MF_DIRECT	GO:0005215~transporter activity	8	3.4188	0.0143553	FXYD2, RBP1, SLC16A10, AQP8, FABP4, AQP1, PDZK1, ABCA5	214	202	16881	3.12409	0.998145	0.502852
GOTERM_BP_DIRECT	GO:0032024~positive regulation of insulin secretion	4	1.7094	0.0158184	MYRIP, ABAT, NR0B2, SLC30A8	218	41	16792	7.51488	1	0.629081
GOTERM_BP_DIRECT	GO:0015701~bicarbonate transport	4	1.7094	0.019108	CA4, CFTR, SLC4A4, AQP1	218	44	16792	7.0025	1	0.6811
GOTERM_BP_DIRECT	GO:0061178~regulation of insulin secretion involved in cellular response to glucose stimulus	3	1.28205	0.019899	SYBU, BRSK2, SIDT2	218	17	16792	13.5931	1	0.679073
GOTERM_BP_DIRECT	GO:0006882~cellular zinc ion homeostasis	3	1.28205	0.019899	SLC39A5, SLC30A8, MT1X	218	17	16792	13.5931	1	0.679073
GOTERM_BP_DIRECT	GO:0001558~regulation of cell growth	5	2.13675	0.0199986	TMEM97, FXYD2, SGK1, FAM107A, IGFBP2	218	80	16792	4.81422	1	0.664666
GOTERM_BP_DIRECT	GO:0006813~potassium ion transport	5	2.13675	0.0216839	KCNJ16, KCNJ5, KCNJ8, AQP1, KCNK3	218	82	16792	4.6968	1	0.679
GOTERM_BP_DIRECT	GO:0007597~blood coagulation, intrinsic pathway	3	1.28205	0.0221982	F11, F8, APOH	218	18	16792	12.8379	1	0.672749
GOTERM_MF_DIRECT	GO:0008270~zinc ion binding	24	10.2564	0.0227013	TRHDE, MT1M, LMO3, ADAMTSL3, PM20D1, ESRRG, ADH1B, RNF186, ANPEP, MT1X, MYRIP, P2RX1, TCEA3, CPA2, CA4, RGN, CPA1, NR5A2, SLC30A8, CPB1, MT1H, DPEP1, MT1G, MT1F	214	1169	16881	1.6195	0.999954	0.631712
GOTERM_BP_DIRECT	GO:0016042~lipid catabolic process	5	2.13675	0.0243704	PNLIP, CLPS, PNLIPRP1, PNLIPRP2, PLA2G1B	218	85	16792	4.53103	1	0.692867
GOTERM_CC_DIRECT	GO:0042583~chromaffin granule	2	0.854701	0.0248661	CHGA, CLU	229	2	18224	79.5808	0.992812	0.3372
GOTERM_BP_DIRECT	GO:0019518~L-threonine catabolic process to glycine	2	0.854701	0.0256794	TDH, GCAT	218	2	16792	77.0275	1	0.698387
GOTERM_BP_DIRECT	GO:0006601~creatine biosynthetic process	2	0.854701	0.0256794	GATM, GAMT	218	2	16792	77.0275	1	0.698387
GOTERM_BP_DIRECT	GO:0070543~response to linoleic acid	2	0.854701	0.0256794	CD36, ADIPOQ	218	2	16792	77.0275	1	0.698387
GOTERM_BP_DIRECT	GO:0009448~gamma-aminobutyric acid metabolic process	2	0.854701	0.0256794	PHGDH, ABAT	218	2	16792	77.0275	1	0.698387
GOTERM_MF_DIRECT	GO:0005242~inward rectifier potassium channel activity	3	1.28205	0.0259325	KCNJ16, KCNJ5, KCNJ8	214	20	16881	11.8325	0.999989	0.646208
GOTERM_MF_DIRECT	GO:0008233~peptidase activity	5	2.13675	0.0271414	CELA3B, HPN, CTRC, SERPINA5, BACE1	214	90	16881	4.3824	0.999994	0.63119
GOTERM_BP_DIRECT	GO:0019835~cytolysis	3	1.28205	0.0297082	C7, C6, C5	218	21	16792	11.0039	1	0.738127
GOTERM_BP_DIRECT	GO:0009235~cobalamin metabolic process	3	1.28205	0.0297082	CTRC, CTRB2, PRSS3	218	21	16792	11.0039	1	0.738127
GOTERM_CC_DIRECT	GO:0005886~plasma membrane	65	27.7778	0.0307571	KCNJ16, NRG4, SLC16A10, AQP8, DPP10, AQP1, NRCAM, VEPH1, AZGP1, PRKAR2B, SLC1A2, MCOLN3, DIRAS3, PAK3, GP2, TRPV6, MUC15, FAM129A, SLC4A4, KIRREL2, SLC43A1, DPEP1, F11, SGK1, ATP4A, PTGER4, CCKBR, F8, LIFR, CFTR, SLC3A1, AMBP, CD36, CHRM3, STXBP6, BACE1, NUCB2, SLC41A1, CA4, C2CD4B, AKAP7, GRB14, SLC38A5, FXYD2, IL22RA1, ZBTB16, SLC30A2, EGF, SLC30A8, TMEM97, HPN, KLB, FLT3, NPY1R, HOMER2, KCNK3,…	229	4121	18224	1.25522	0.997808	0.375625
GOTERM_MF_DIRECT	GO:0005385~zinc ion transmembrane transporter activity	3	1.28205	0.0310151	SLC30A2, SLC39A5, SLC30A8	214	22	16881	10.7568	0.999999	0.651545
GOTERM_MF_DIRECT	GO:0005179~hormone activity	5	2.13675	0.0311723	TTR, IAPP, GPHA2, SST, ADIPOQ	214	94	16881	4.19591	0.999999	0.626181
GOTERM_CC_DIRECT	GO:0031093~platelet alpha granule lumen	4	1.7094	0.0314929	ALB, CLU, F8, EGF	229	55	18224	5.78769	0.998111	0.36109
GOTERM_BP_DIRECT	GO:1901687~glutathione derivative biosynthetic process	3	1.28205	0.0324056	GSTA1, GSTA2, GSTA3	218	22	16792	10.5038	1	0.756615
GOTERM_BP_DIRECT	GO:0043171~peptide catabolic process	3	1.28205	0.0324056	TRHDE, PM20D1, ANPEP	218	22	16792	10.5038	1	0.756615
GOTERM_BP_DIRECT	GO:0007596~blood coagulation	7	2.99145	0.0324593	F11, PRKAR2B, CD36, P2RX1, SERPINA5, F8, TFPI2	218	184	16792	2.93039	1	0.745463
GOTERM_MF_DIRECT	GO:0005102~receptor binding	10	4.2735	0.0353953	NRG4, IAPP, C5, EPHX2, PLA2G1B, ANGPTL1, CRAT, IGFBP2, CXCL12, ADIPOQ	214	353	16881	2.23465	1	0.648332
GOTERM_BP_DIRECT	GO:0006749~glutathione metabolic process	4	1.7094	0.0357606	GSTA1, GSTA2, GSTA3, DPEP1	218	56	16792	5.50197	1	0.768071
GOTERM_BP_DIRECT	GO:0019254~carnitine metabolic process, CoA-linked	2	0.854701	0.0382719	CRAT, ACADL	218	3	16792	51.3517	1	0.780639
GOTERM_BP_DIRECT	GO:0019343~cysteine biosynthetic process via cystathionine	2	0.854701	0.0382719	CTH, CBS	218	3	16792	51.3517	1	0.780639
GOTERM_BP_DIRECT	GO:0055085~transmembrane transport	8	3.4188	0.0397188	AZGP1, SLC16A10, SLC17A4, SLC16A12, SLC41A1, CFTR, SLC43A1, ABCA5	218	244	16792	2.52549	1	0.782993
GOTERM_BP_DIRECT	GO:0051289~protein homotetramerization	4	1.7094	0.0425389	CTH, MAT1A, GNMT, ACADL	218	60	16792	5.13517	1	0.796176
GOTERM_BP_DIRECT	GO:0008652~cellular amino acid biosynthetic process	3	1.28205	0.0440896	BCAT1, GPT2, CBS	218	26	16792	8.88779	1	0.798641
GOTERM_BP_DIRECT	GO:0001523~retinoid metabolic process	4	1.7094	0.0443271	PNLIP, TTR, CLPS, RBP1	218	61	16792	5.05099	1	0.791274
GOTERM_MF_DIRECT	GO:0005496~steroid binding	3	1.28205	0.0452384	SERPINA6, PDIA2, ESRRG	214	27	16881	8.7648	1	0.715951
GOTERM_MF_DIRECT	GO:0004181~metallocarboxypeptidase activity	3	1.28205	0.0452384	CPA2, CPA1, CPB1	214	27	16881	8.7648	1	0.715951
GOTERM_MF_DIRECT	GO:0004301~epoxide hydrolase activity	2	0.854701	0.049528	EPHX2, EPHX1	214	4	16881	39.4416	1	0.727412
GOTERM_BP_DIRECT	GO:0003056~regulation of vascular smooth muscle contraction	2	0.854701	0.0507023	CHRM3, P2RX1	218	4	16792	38.5138	1	0.826127
GOTERM_BP_DIRECT	GO:0006564~L-serine biosynthetic process	2	0.854701	0.0507023	PHGDH, PSAT1	218	4	16792	38.5138	1	0.826127
GOTERM_BP_DIRECT	GO:0070814~hydrogen sulfide biosynthetic process	2	0.854701	0.0507023	CTH, CBS	218	4	16792	38.5138	1	0.826127
GOTERM_BP_DIRECT	GO:0019344~cysteine biosynthetic process	2	0.854701	0.0507023	CTH, CBS	218	4	16792	38.5138	1	0.826127
GOTERM_BP_DIRECT	GO:0006629~lipid metabolic process	6	2.5641	0.0534055	CEL, CLPS, PNLIPRP1, CD36, CLU, PLTP	218	157	16792	2.94373	1	0.834162
GOTERM_BP_DIRECT	GO:0006006~glucose metabolic process	4	1.7094	0.0558231	ONECUT1, PDK4, NPY1R, ADIPOQ	218	67	16792	4.59866	1	0.839946
GOTERM_BP_DIRECT	GO:0006730~one-carbon metabolic process	3	1.28205	0.0570757	MAT1A, CA4, GNMT	218	30	16792	7.70275	1	0.839221
GOTERM_BP_DIRECT	GO:0030449~regulation of complement activation	3	1.28205	0.0570757	C7, C6, C5	218	30	16792	7.70275	1	0.839221
GOTERM_BP_DIRECT	GO:0009058~biosynthetic process	3	1.28205	0.0570757	GCAT, GPT2, PBLD	218	30	16792	7.70275	1	0.839221
GOTERM_BP_DIRECT	GO:0009749~response to glucose	4	1.7094	0.0578642	NR0B2, SIDT2, SLC30A8, ADIPOQ	218	68	16792	4.53103	1	0.836105
GOTERM_BP_DIRECT	GO:0034197~triglyceride transport	2	0.854701	0.0629729	CD36, APOH	218	5	16792	30.811	1	0.854345
GOTERM_BP_DIRECT	GO:0030240~skeletal muscle thin filament assembly	2	0.854701	0.0629729	TTN, PROX1	218	5	16792	30.811	1	0.854345
GOTERM_BP_DIRECT	GO:0019346~transsulfuration	2	0.854701	0.0629729	CTH, CBS	218	5	16792	30.811	1	0.854345
GOTERM_BP_DIRECT	GO:0050873~brown fat cell differentiation	3	1.28205	0.0640063	BNIP3, FABP4, ADIPOQ	218	32	16792	7.22133	1	0.852457
GOTERM_MF_DIRECT	GO:0004364~glutathione transferase activity	3	1.28205	0.0718622	GSTA1, GSTA2, GSTA3	214	35	16881	6.76142	1	0.835069
GOTERM_MF_DIRECT	GO:0015174~basic amino acid transmembrane transporter activity	2	0.854701	0.0733686	SLC7A2, SLC3A1	214	6	16881	26.2944	1	0.825279
GOTERM_BP_DIRECT	GO:1990822~basic amino acid transmembrane transport	2	0.854701	0.0750855	SLC7A2, SLC3A1	218	6	16792	25.6758	1	0.889948
GOTERM_BP_DIRECT	GO:0071280~cellular response to copper ion	2	0.854701	0.0750855	AQP1, MT1G	218	6	16792	25.6758	1	0.889948
GOTERM_BP_DIRECT	GO:1903715~regulation of aerobic respiration	2	0.854701	0.0750855	BNIP3, CBFA2T3	218	6	16792	25.6758	1	0.889948
GOTERM_MF_DIRECT	GO:0042803~protein homodimerization activity	15	6.41026	0.0790611	IMPA2, FLT3, EPHX2, BNIP3, NR0B2, ZBTB16, ADIPOQ, HOMER2, KCNK3, AMBP, NTRK2, ABAT, SLC30A8, CBS, MTUS2	214	730	16881	1.62089	1	0.833267
GOTERM_CC_DIRECT	GO:0009986~cell surface	12	5.12821	0.0793233	AMBP, CEL, SLC1A2, HPN, CD36, BACE1, CLU, APOH, PLA2G1B, CA4, CFTR, ADIPOQ	229	542	18224	1.76194	1	0.660375
GOTERM_MF_DIRECT	GO:0008237~metallopeptidase activity	4	1.7094	0.0827798	TRHDE, ADAMTSL3, ANPEP, DPEP1	214	81	16881	3.89547	1	0.833019
GOTERM_MF_DIRECT	GO:0072341~modified amino acid binding	2	0.854701	0.0850648	DPEP1, CBS	214	7	16881	22.5381	1	0.827582
GOTERM_BP_DIRECT	GO:0007631~feeding behavior	3	1.28205	0.0863239	CCKBR, NTRK2, NPY1R	218	38	16792	6.08112	1	0.917563
GOTERM_BP_DIRECT	GO:0050667~homocysteine metabolic process	2	0.854701	0.0870423	DPEP1, CBS	218	7	16792	22.0079	1	0.914798
GOTERM_BP_DIRECT	GO:0044539~long-chain fatty acid import	2	0.854701	0.0870423	CD36, SPX	218	7	16792	22.0079	1	0.914798
GOTERM_BP_DIRECT	GO:0046500~S-adenosylmethionine metabolic process	2	0.854701	0.0870423	GAMT, GNMT	218	7	16792	22.0079	1	0.914798
GOTERM_BP_DIRECT	GO:0030157~pancreatic juice secretion	2	0.854701	0.0870423	CEL, AQP1	218	7	16792	22.0079	1	0.914798
GOTERM_BP_DIRECT	GO:0006953~acute-phase response	3	1.28205	0.0902431	REG3A, F8, REG3G	218	39	16792	5.92519	1	0.918185
GOTERM_CC_DIRECT	GO:0005788~endoplasmic reticulum lumen	6	2.5641	0.0937438	ARSE, ERP27, FLT3, PDIA2, BACE1, F8	229	192	18224	2.4869	1	0.70055
GOTERM_CC_DIRECT	GO:0016021~integral component of membrane	75	32.0513	0.0950462	KCNJ16, NRG4, ARSE, SLC16A10, AQP8, SLC16A12, DPP10, KIAA1324, RNF186, TSPAN7, BNIP3, CUZD1, ANPEP, DLK1, AQP1, SIDT2, NRCAM, REG3A, ART3, SLC1A2, MCOLN3, GP2, TRPV6, MUC15, KIRREL2, SLC4A4, SLC43A1, ATP4A, PTGER4, CCKBR, PEBP4, F8, LIFR, CFTR, CYB5A, SLC3A1, CD36, STXBP6, CHST9, SPAG4, BACE1, LRMP, SLC41A1, CA4, FKBP11, SLC38A5, TPST2, IL22RA1, ABCA5, TMED6, SYBU, SLC30A2, UGT2A3, SLC39A5, EGF, …	229	5163	18224	1.15603	1	0.683825
GOTERM_CC_DIRECT	GO:0036057~slit diaphragm	2	0.854701	0.0958307	NPHS1, KIRREL2	229	8	18224	19.8952	1	0.666106
GOTERM_MF_DIRECT	GO:0070573~metallodipeptidase activity	2	0.854701	0.096614	PM20D1, DPEP1	214	8	16881	19.7208	1	0.853637
GOTERM_MF_DIRECT	GO:1902282~voltage-gated potassium channel activity involved in ventricular cardiac muscle cell action potential repolarization	2	0.854701	0.096614	KCNJ5, KCNJ8	214	8	16881	19.7208	1	0.853637
GOTERM_BP_DIRECT	GO:0050830~defense response to Gram-positive bacterium	4	1.7094	0.0976172	CHGA, CD36, PLA2G1B, REG3G	218	85	16792	3.62482	1	0.930196
GOTERM_BP_DIRECT	GO:0045617~negative regulation of keratinocyte differentiation	2	0.854701	0.0988452	REG3A, REG3G	218	8	16792	19.2569	1	0.928804
GOTERM_BP_DIRECT	GO:0098915~membrane repolarization during ventricular cardiac muscle cell action potential	2	0.854701	0.0988452	KCNJ5, KCNJ8	218	8	16792	19.2569	1	0.928804
GOTERM_BP_DIRECT	GO:0090181~regulation of cholesterol metabolic process	2	0.854701	0.0988452	EPHX2, ACADL	218	8	16792	19.2569	1	0.928804
GOTERM_BP_DIRECT	GO:0034383~low-density lipoprotein particle clearance	2	0.854701	0.0988452	CD36, ADIPOQ	218	8	16792	19.2569	1	0.928804
